# Supplementary material for: Pregnancy's Stronghold on the Vaginal Microbiome
Source: PubMed Central journal article supplement (PMC4045671; doi:10.1371/journal.pone.0098514), 2014-06-04
Supplement: pone.0098514.s004.pdf [file pone.0098514.s004.pdf]

**Supplemental Table 1** – Comparison between main parameters. The number of subjects in prohibitive for most of the analyses that would allow the disentanglement of the variables.

|                                                                                                                                       |              |
|---------------------------------------------------------------------------------------------------------------------------------------|--------------|
| Unweighted Beta-Diversity - Monte Carlo 999 permutations                                                                              |              |
| Overall Comparison                                                                                                                    | p-value      |
| 454 (50 subjects) vs Illumina (12 subjects)                                                                                           | <b>0.001</b> |
| African-American (35 subjects) vs Caucasian (27 subjects)                                                                             | 0.224        |
| Pregnant (33 subjects) vs No Pregnant (29 subjects)                                                                                   | <b>0.001</b> |
| <b>Platform Effect</b>                                                                                                                |              |
| <b>454 &amp; African-American &amp; Pregnant (19 subjects) vs Illumina &amp; African-American &amp; Pregnant (0 subjects)</b>         | NA           |
| <b>454 &amp; Caucasian &amp; Pregnant (2 subjects) vs Illumina &amp; Caucasian &amp; Pregnant (12 subjects)</b>                       | NA           |
| <b>454 &amp; African-American &amp; Not Pregnant (16 subjects) vs Illumina &amp; African-American &amp; Not Pregnant (0 subjects)</b> | NA           |
| <b>454 &amp; Caucasian &amp; Not Pregnant (13 subjects) vs Illumina &amp; Caucasian &amp; Not Pregnant (0 subjects)</b>               | NA           |
| <b>Ethnicity Effect</b>                                                                                                               |              |
| <b>African-American &amp; 454 &amp; Pregnant (19 subjects) vs Caucasian &amp; 454 &amp; Pregnant (2 subjects)</b>                     | NA           |
| <b>African-American &amp; Illumina &amp; Pregnant (0 subjects) vs Caucasian &amp; Illumina &amp; Pregnant (12 subjects)</b>           | NA           |
| <b>African-American &amp; 454 &amp; Not Pregnant (16 subjects) vs Caucasian &amp; 454 &amp; Not Pregnant (13 subjects)</b>            | <b>0.001</b> |
| <b>African-American &amp; Illumina &amp; Not Pregnant (0 subjects) vs Caucasian &amp; Illumina &amp; Not Pregnant (0 subjects)</b>    | NA           |
| <b>Pregnancy Effect</b>                                                                                                               |              |
| <b>Pregnant &amp; 454 &amp; African-American (19 subjects) vs Not Pregnant &amp; 454 &amp; African-American (16 subjects)</b>         | <b>0.001</b> |
| <b>Pregnant &amp; Illumina &amp; African-American (0 subjects) vs Not Pregnant &amp; Illumina &amp; African-American (0 subjects)</b> | NA           |
| <b>Pregnant &amp; 454 &amp; Caucasian (2 subjects) vs Not Pregnant &amp; 454 &amp; Caucasian (13 subjects)</b>                        | NA           |
| <b>Pregnant &amp; Illumina &amp; Caucasian (12 subjects) vs Not Pregnant &amp; Illumina &amp; Caucasian (0 subjects)</b>              | NA           |
